# Supplementary material for: Long-term interleukin-4 release from 3D printable affinity hydrogels promotes M2-like macrophage polarisation in vitro
Source: Royal Society of Chemistry journal article supplement (doi:10.1039/d4bm01623h), 2025-01-01
Supplement: d4bm01623h1.pdf [file d4bm01623h1.pdf]

# Long-term Interleukin-4 Release from 3D Printable Affinity Hydrogels Promotes M2-like Macrophage Polarisation In-vitro

George A. Loxley<sup>1,2,3,4</sup>, Consuelo Coser<sup>1,2,3</sup>, Amir M. Ghaemmaghami<sup>2\*</sup>, Jing Yang<sup>1,3\*</sup>

<sup>1</sup>Division of Regenerative Medicine and Cellular Therapies, Biodiscovery Institute, School of Pharmacy, University of Nottingham, Nottingham NG7 2RD, United Kingdom

<sup>2</sup>Immunology & Immuno-bioengineering Group, School of Life Sciences, Faculty of Medicine and Health Sciences, University of Nottingham, Nottingham NG7 2RD, United Kingdom

<sup>3</sup>Biodiscovery Institute, School of Pharmacy, University of Nottingham, Nottingham NG7 2RD, United Kingdom

<sup>4</sup>Section of Immunology, School of Biosciences, University of Surrey, Guildford, Surrey, GU2 7XH

Keywords: Controlled release, 3D printing, Immunomodulation, Affinity hydrogel, Cytokine release

\*Corresponding authors:

[jing.yang@nottingham.ac.uk](mailto:jing.yang@nottingham.ac.uk)

[amir.ghaemmaghami@nottingham.ac.uk](mailto:amir.ghaemmaghami@nottingham.ac.uk)

## Supplementary data

### Bradford assay standard curve

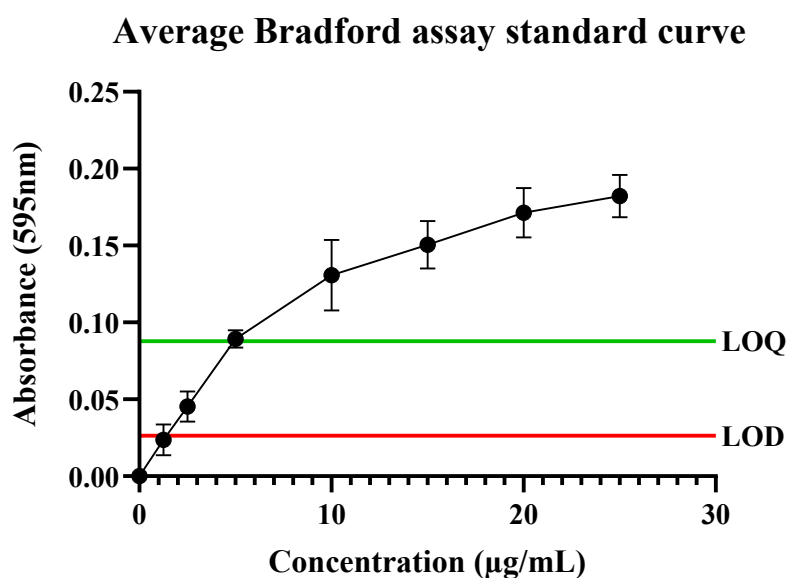

**Figure S1: Average Bradford assay standard curve.** Values presented as mean  $\pm$  standard deviation (N=7, n=3).

## Lysozyme controlled release method

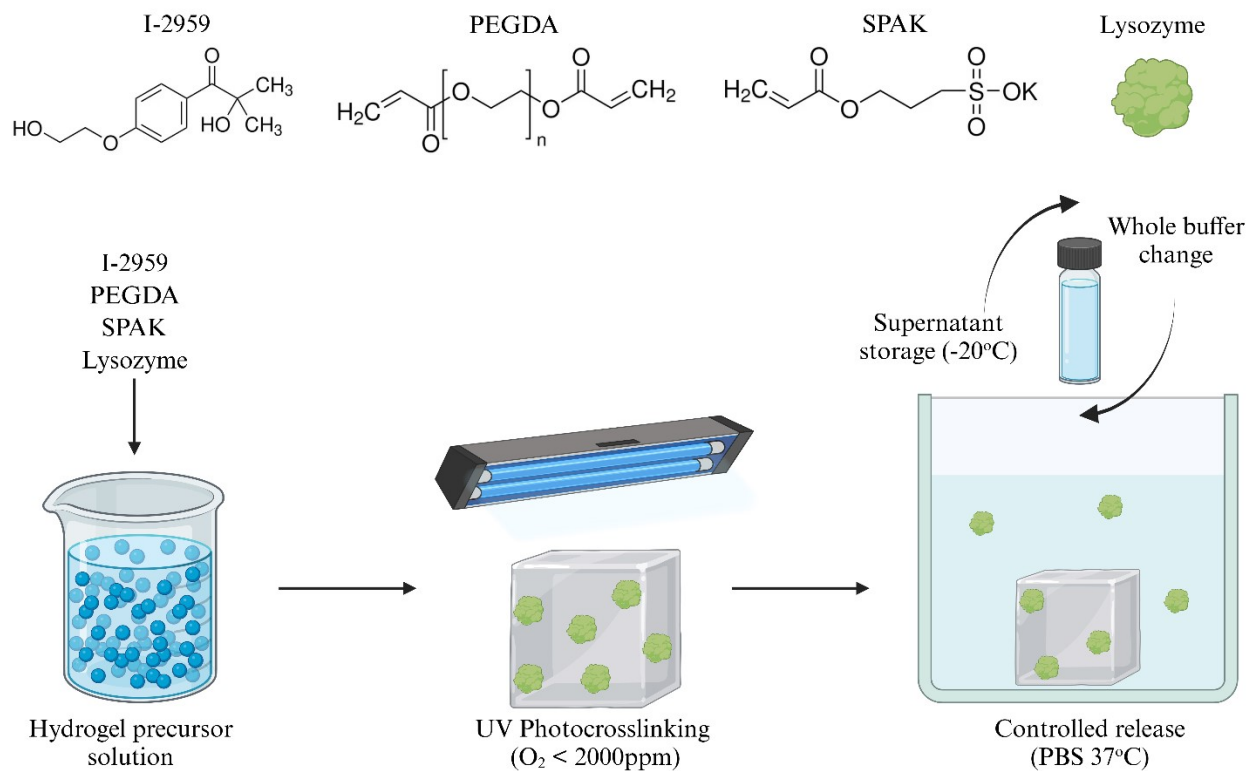

**Figure S2: Schematic showing methodology for 70 day controlled release of lysozyme from SPAK-PEGDA**

### Effect of 10 minutes UV exposure on lysozyme bioactivity

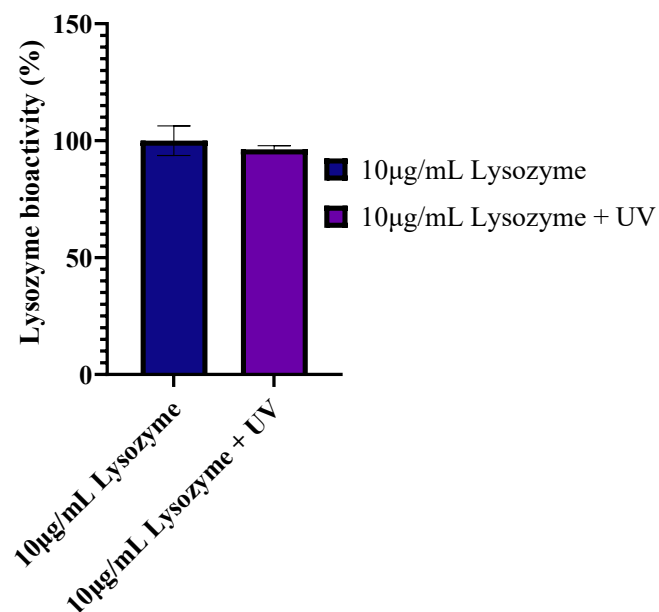

**Figure S3: Effect of 10 minutes 365nm UV light irradiation on the bioactivity of 10µg/mL lysozyme.** Values presented as mean  $\pm$  standard deviation (N=3, n=3).

### Effect of PEGDA molecular weight

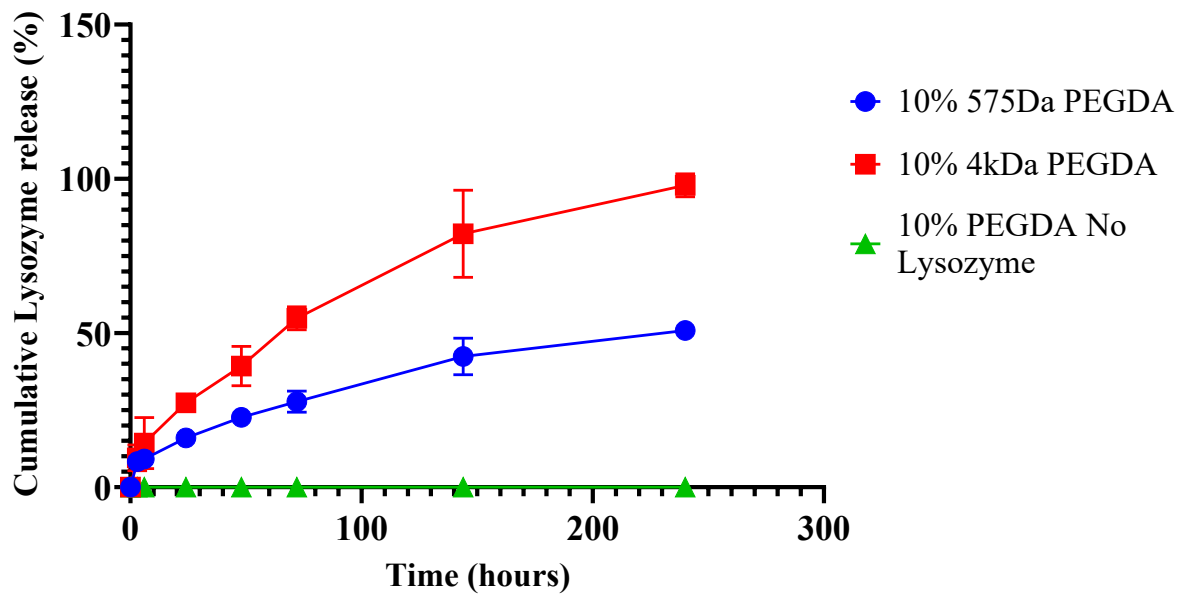

**Figure S4 : Effect of PEGDA molecular weight on lysozyme release in 500 $\mu$ L 10% PEGDA hydrogels loaded with 1mg/mL lysozyme.** Values presented as mean  $\pm$  standard deviation (N=2, n=3).

Effect of UV irradiation on TGF-  $\beta$ 1 ELISA standards in the presence of 0.5% w/v irgacure-2959 photoinitiator

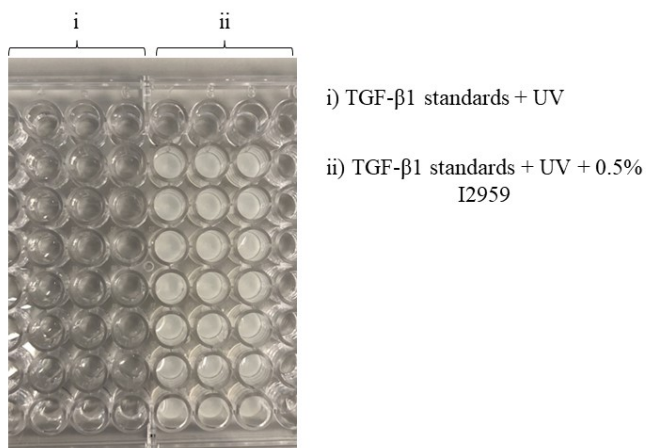

**Figure S5 : Macroscopic image of TGF-  $\beta$ 1 ELISA standards following 10 minutes 365nm UV light irradiation.** i) TGF-  $\beta$ 1 standards. ii) TGF-  $\beta$ 1 standards containing 0.5% w/v Irgacure-2959 photoinitiator.

The diagram illustrates the process of creating an IL-4 loaded hydrogel for macrophage polarization. The process begins with the chemical structures of the components: I-2959 (a benzene ring with a hydroxymethyl group and a hydroxyl group), PEGDA (poly(ethylene glycol) diacrylate), SPAK (sulfobetaine polyacrylate), and IL-4 (a green, irregularly shaped molecule). The process steps are as follows: 1. **UV Photocrosslinking** (10 mins 365nm, O<sub>2</sub> < 2000ppm) to form a hydrogel from I-2959, PEGDA, and SPAK. 2. **In-vitro swelling** of the hydrogel in water. 3. **IL-4 loading** (24h 37°C) where the hydrogel is immersed in a solution containing IL-4 molecules. 4. **Sustained release** (Complete media 37°C) where the hydrogel is placed in a well containing complete media. 5. **Whole media change** and **Storage** (Supernatant storage (-20°C)) of the media. 6. **Macrophage polarisation** where the stored supernatant is added to a culture of macrophages, leading to their polarization.

0% SPAK

1% SPAK

5% SPAK

**Figure S7: Scanning electron microscopy of 0%, 1%, and 5% SPAK-PEGDA hydrogels.** Pore size was investigated in 10% 4kDa PEGDA hydrogels containing 0%, 1%, and 5% SPAK after 5 days of in-vitro swelling.

## THP-1 macrophage IL-10 secretion

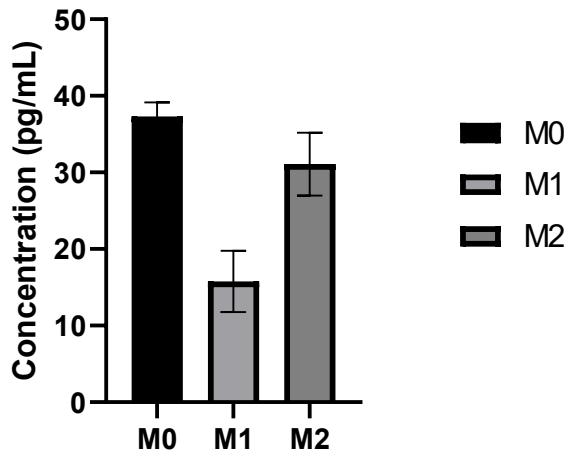

**Figure S8: IL-10 secretion from THP-1 macrophages following 6 days of culture.** M0 was polarised with 50ng/mL M-CSF, M1 was polarised with 50ng/mL GM-CSF + 20ng/mL IFN- $\gamma$ , M2 was polarised with 50ng/mL M-CSF + 20ng/mL IL-4. Values presented as mean  $\pm$  standard deviation (n=3).

THP-1 macrophage polarisation using IL-4 controlled release supernatant from days 1 and 2 of in-vitro release from 5% SPAK 10% PEGDA

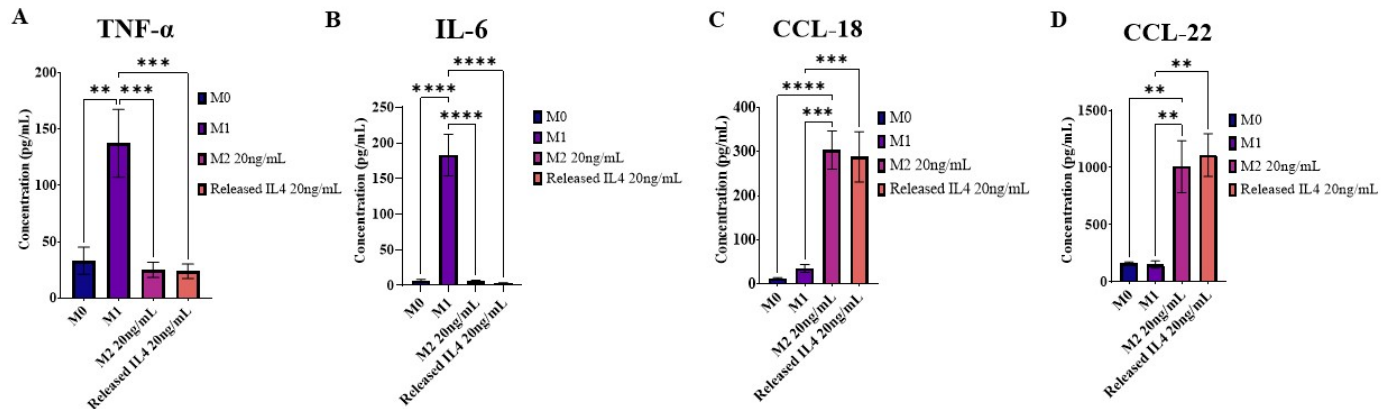

**Figure S9: Secreted macrophage polarisation markers of THP-1 cells polarised with IL-4 released from 5% SPAK-10% PEGDA at days 1 and 2 of in-vitro release.** TNF- $\alpha$  and IL-6 were selected as M1 markers. CCL-18 and CCL-22 were selected as M2 markers. Secreted markers were compared between released IL-4 and stock IL-4 at a concentration of 20ng/mL. Control groups of M0 and M1 polarisation were included. Data presented as mean  $\pm$  standard error of the mean from two independent experiments which used media samples from day 1 and day 2 of controlled release respectively. (N=2, n=3). Following one-way ANOVA and Tukey's post hoc multiple comparisons test, pairs with significant differences were labelled as \*  $P \leq 0.05$ , \*\*  $P < 0.01$ , \*\*\*  $P < 0.001$  and \*\*\*\*  $P < 0.0001$ .

THP-1 macrophage polarisation using IL-4 controlled release supernatant from days 12 and 15 of in-vitro release from 5% SPAK 10% PEGDA

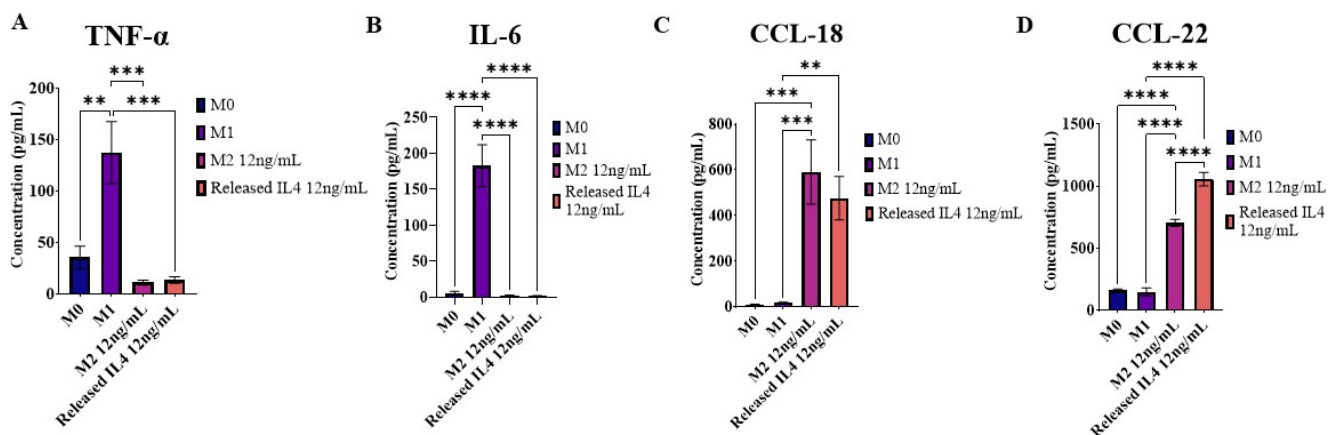

**Figure S10: Secreted macrophage polarisation markers of THP-1 cells polarised with IL-4 released from 5% SPAK-10% PEGDA at days 12 and 15 of in-vitro release.** TNF-α and IL-6 were selected as M1 markers. CCL-18 and CCL-22 were selected as M2 markers. Secreted markers were compared between released IL-4 and stock IL-4 at a concentration of 12ng/mL. Control groups of M0 and M1 polarisation were included. Data presented as mean ± standard error of the mean from two independent experiments which used media samples from day 1 and day 2 of controlled release respectively. (N=2, n=3). Following one-way ANOVA and Tukey's post hoc multiple comparisons test, pairs with significant differences were labelled as \* P≤0.05, \*\* P<0.01, \*\*\* P<0.001 and \*\*\*\* P<0.0001.

Average diameter of macropores in 3D printed SPAK PEGDA hydrogels

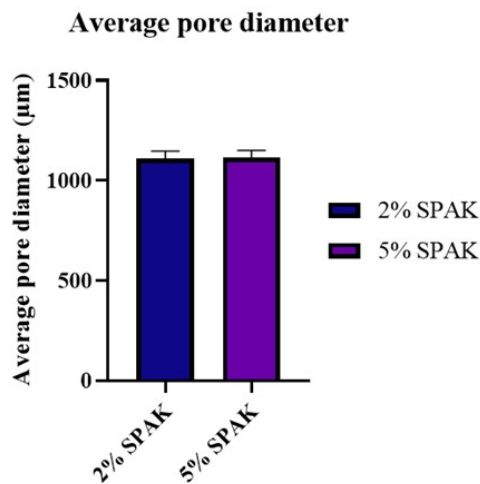

**Figure S11: Average pore diameter from 3D printed SPAK PEGDA hydrogels.** Mean calculated from measuring 5 pores from 5 separate hydrogels expressed as mean ± standard deviation (N=5 n=5).
